# Supplementary material for: Thermodynamic characterization of the interaction between the human Y-box binding protein YB-1 and nucleic acids
Source: Royal Society of Chemistry journal article supplement (doi:10.1039/c5mb00184f), 2015-06-11

## Supporting Information

### **Thermodynamic characterization of the interaction between human Y-box binding protein YB-1 and nucleic acids**

Yumiko Tanabe<sup>1</sup>, Satoru Nagatoishi<sup>2,3</sup>, Kouhei Tsumoto<sup>1,2,3,\*</sup>

<sup>1</sup>Department of Medical Genome Sciences, Graduate School of Frontier Sciences, The University of Tokyo, 4-6-1, Shirokanedai, Minato-ku, Tokyo 108-8639, Japan

<sup>2</sup>Department of Bioengineering, School of Engineering, The University of Tokyo, 7-3-1, Hongo, Bunkyo-ku, Tokyo 113-8656, Japan

<sup>3</sup>Medical Proteomics Laboratory, Institute of Medical Science, The University of Tokyo, 4-6-1, Shirokanedai, Minato-ku, Tokyo 108-8639, Japan

Phone: +81-3-5449-5316

Fax: +81-3-6409-2127

E-mail: [tsumoto@bioeng.t.u-tokyo.ac.jp](mailto:tsumoto@bioeng.t.u-tokyo.ac.jp)

Page S1: Contents.

Page S2: Table S1 for Molecular weights of constructs determined by size exclusion chromatography.

Page S3: Figure S1 for size exclusion chromatography of YB-1 and fragments.

Page S4: Figure S2 for ITC profiles of the interaction between CSD and ssDNA.

**Table S1.** Molecular weights of constructs determined by size exclusion chromatography

|             | Mw calc. (kDa) | Mw obs. in SEC (kDa) |
|-------------|----------------|----------------------|
| YB-1(Full)  | 37.0           | 89.5                 |
| YB-1(1-219) | 24.9           | 52.3                 |

**Figure S1.** Size exclusion chromatography of YB-1 and fragments. (A) YB-1(Full), (B) YB-1(1-219). Absorbance at 280 nm is indicated by the blue line; the orange line indicates absorbance at 260 nm.

(A)

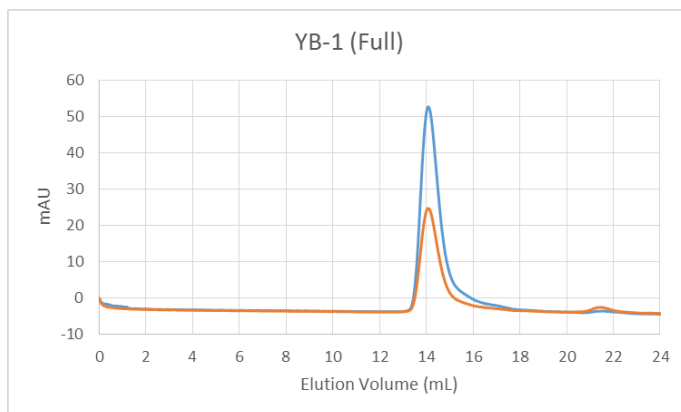

(B)

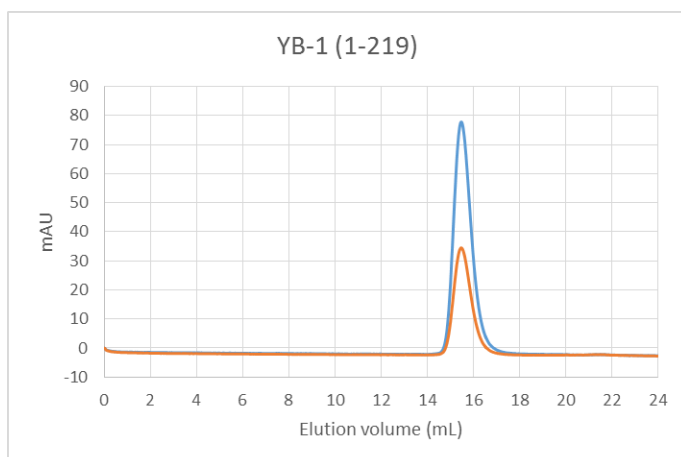

**Figure S2.** ITC profiles of the interaction between CSD and ssDNA. (A) 15 °C at 500 mM NaCl, (B) 30 °C at 500 mM NaCl, (C) 37 °C at 500 mM NaCl, (D) 15 °C at 150 mM NaCl, (E) 30 °C at 150 mM NaCl, (F) 37 °C at 150 mM NaCl.

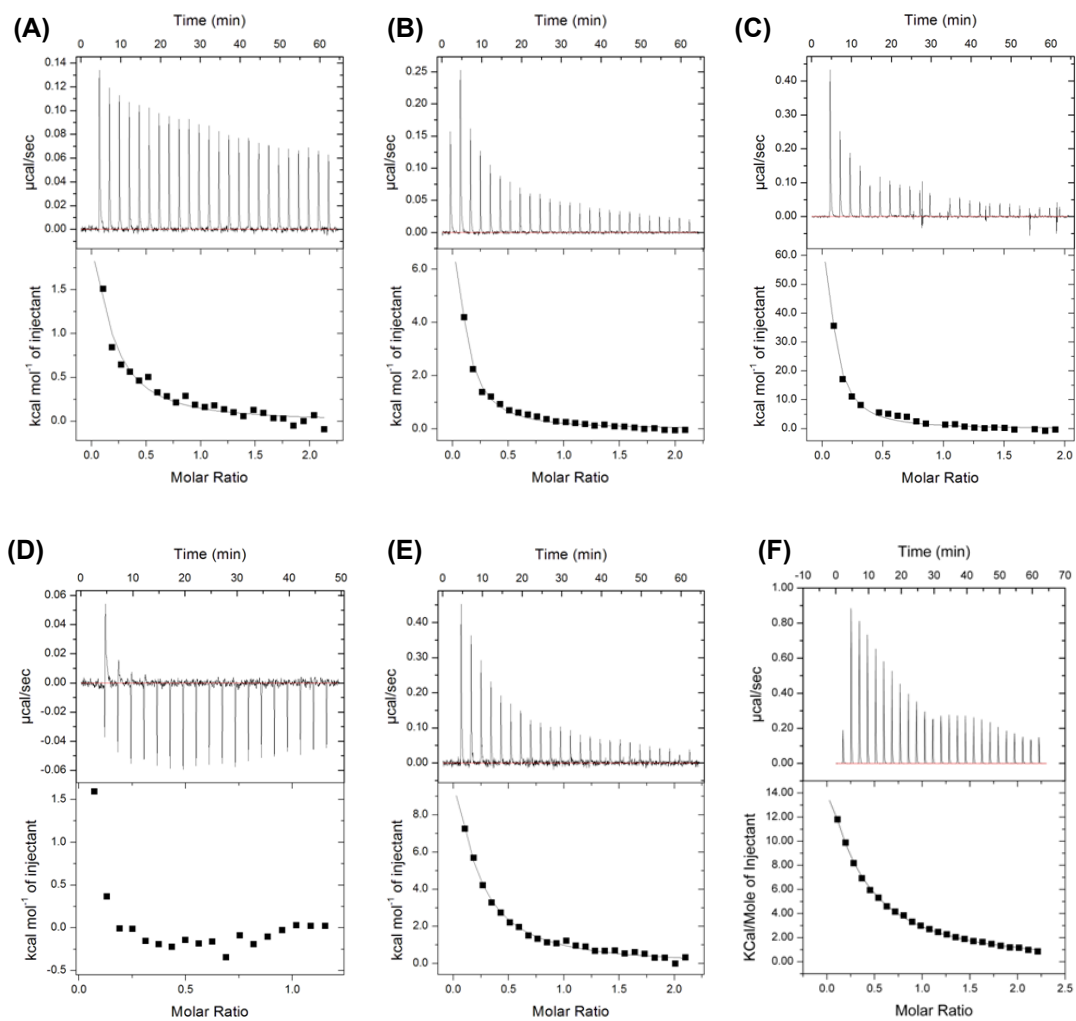

Supplement: c5mb00184f1.pdf [file c5mb00184f1.pdf]
